# Supplementary material
Source: PubMed Central journal article supplement (PMC3095920)
Supplement: supp_44_4_474__2.pdf [file supp_44_4_474__2.pdf]

Supplement figure 1

A. hMDMs

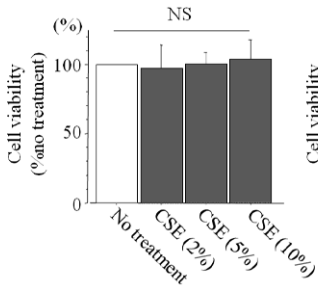

B. Raw264.7 cells

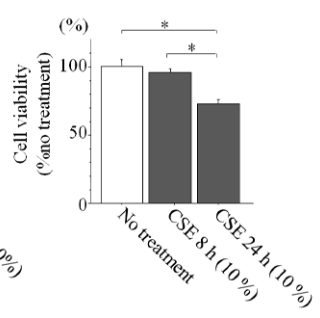

Supplement figure 2

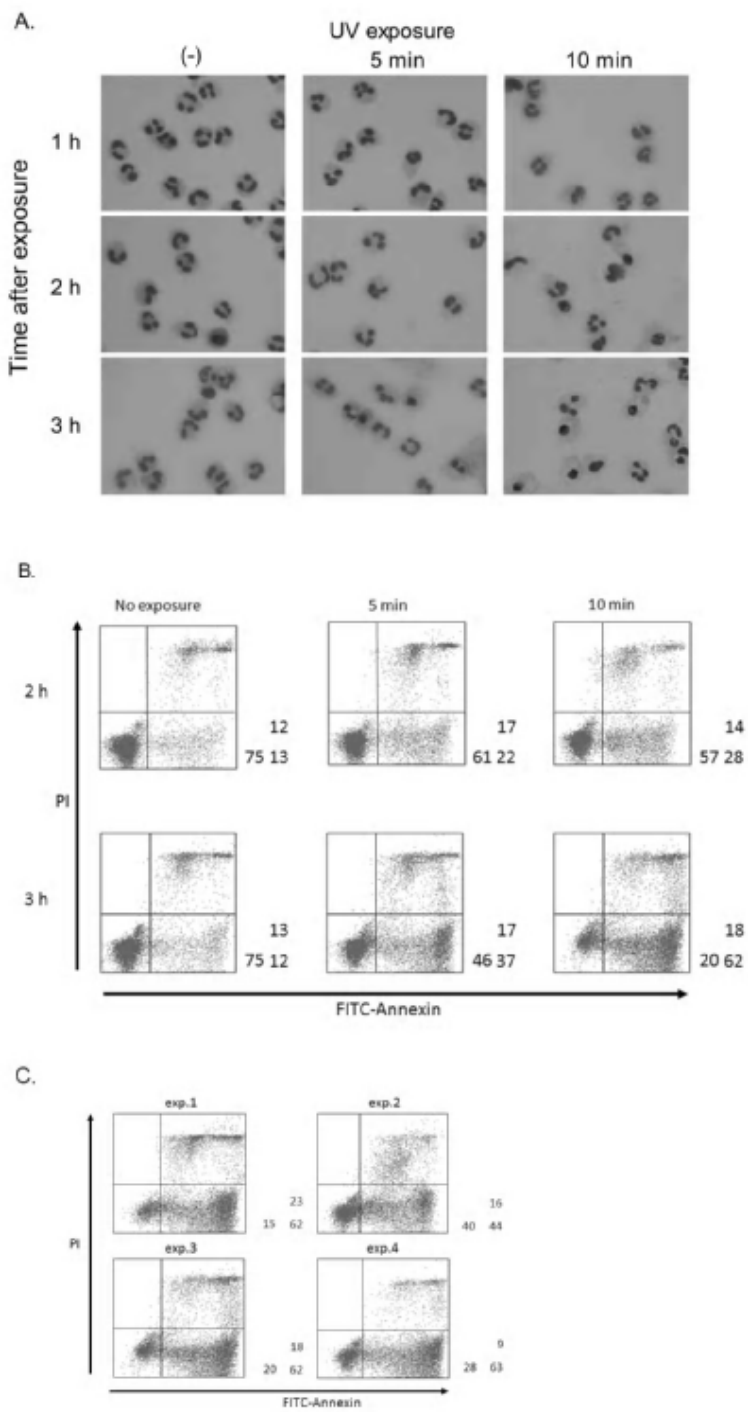

Supplement figure 3

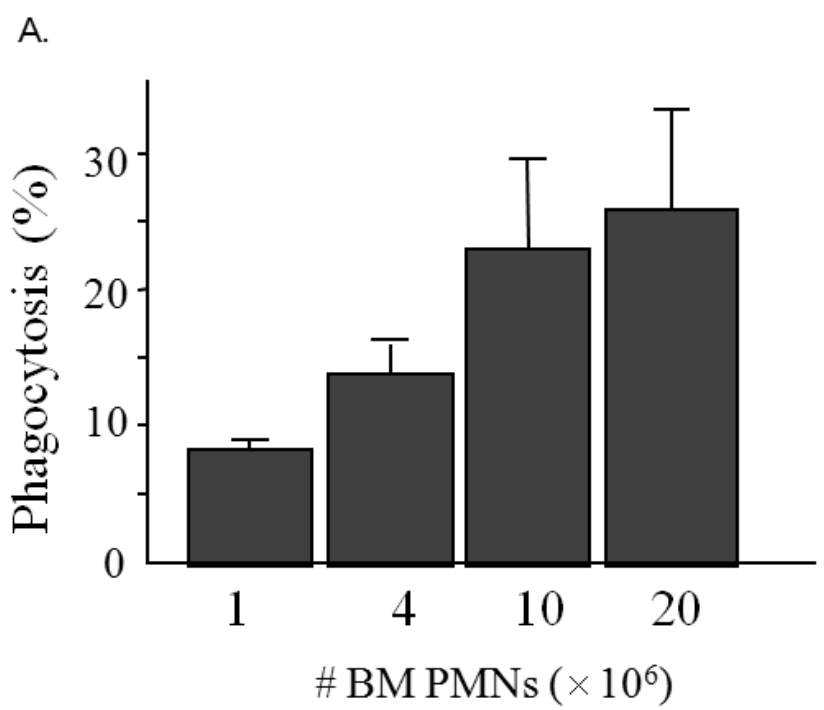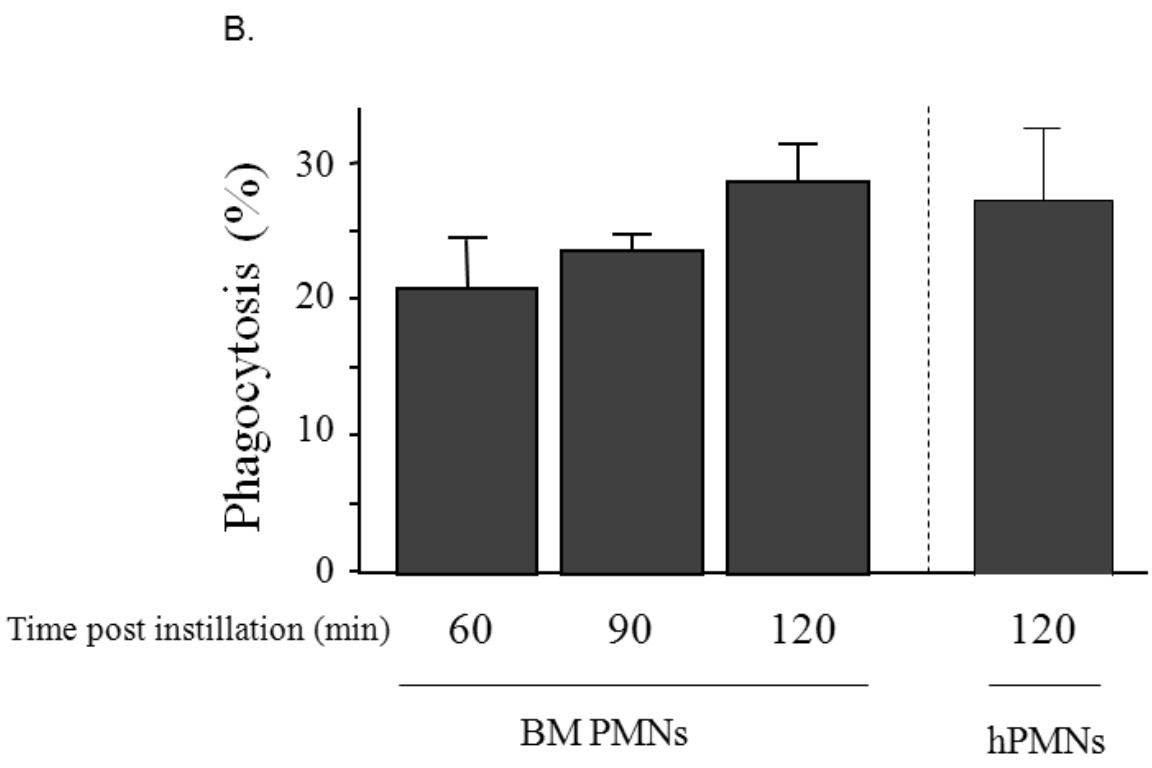

Supplemental figure 4

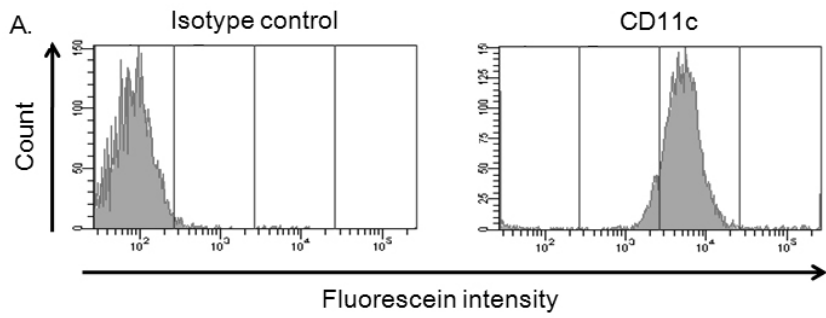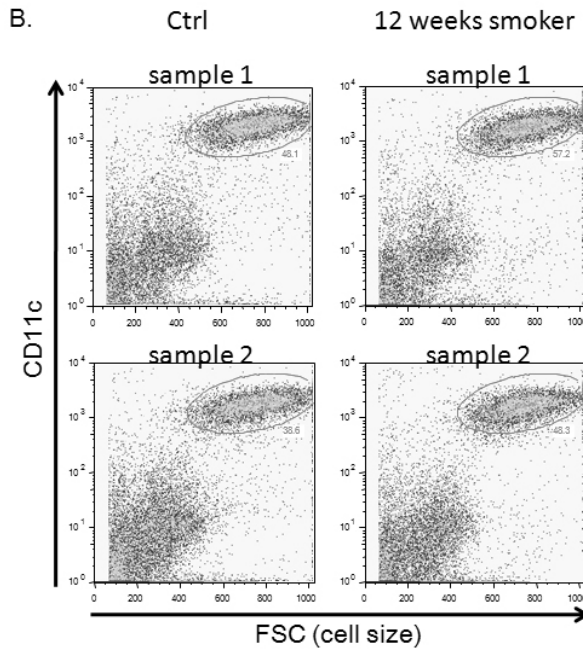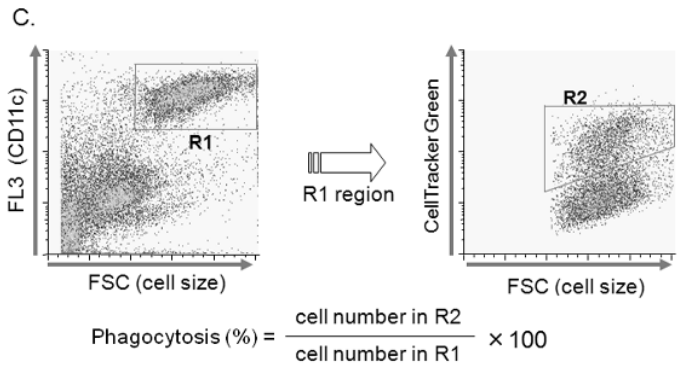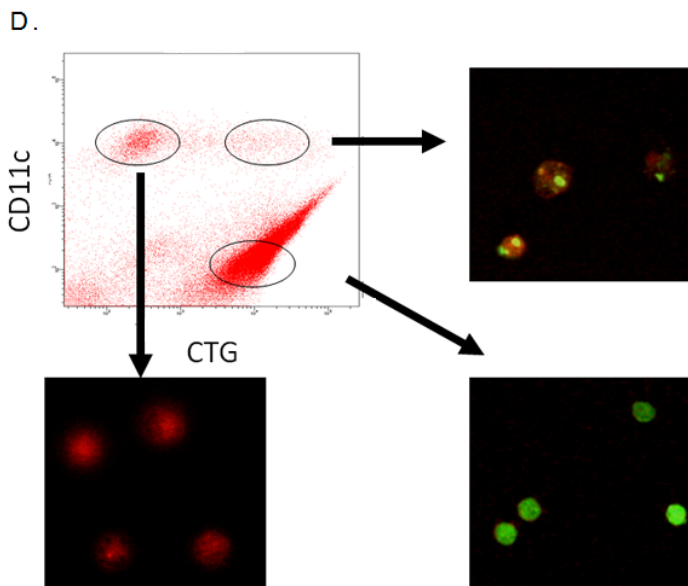

# Supplemental figure 5

A.

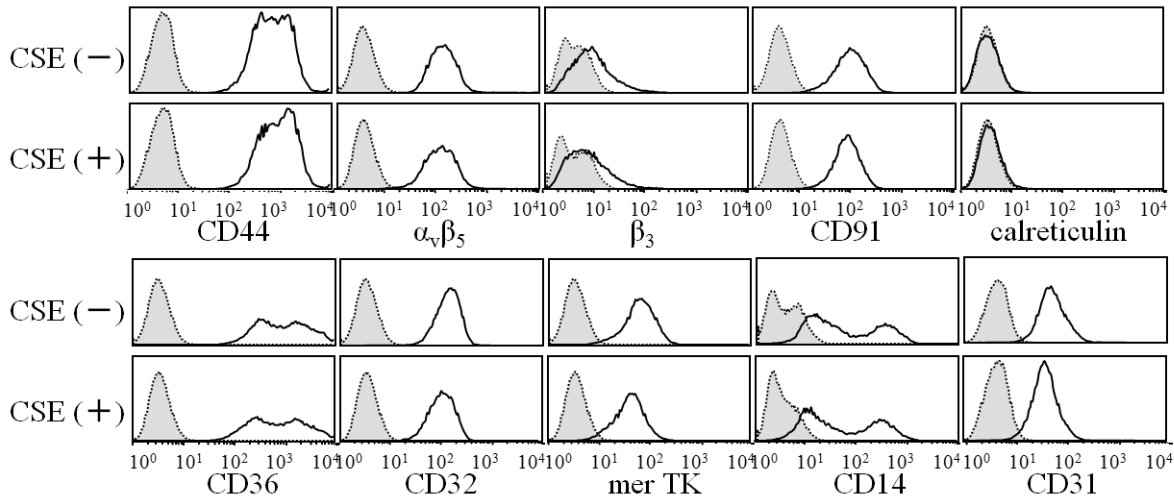

B.

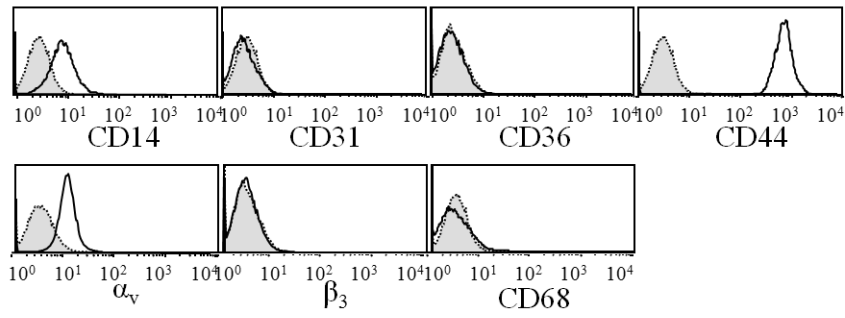

C.

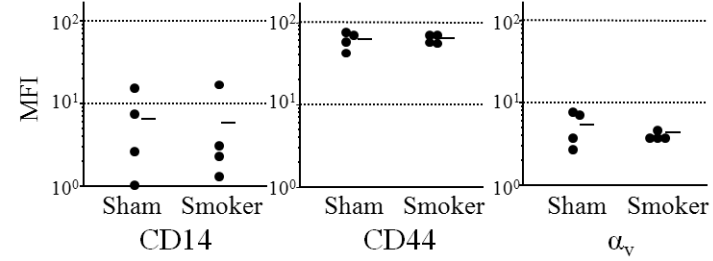

Supplemental table 1

Actual fraction (%) of macrophages engulfing apoptotic neutrophils for Fig.1A

| CSE concentration | n | mean | SD  | SEM |
|-------------------|---|------|-----|-----|
| Ctrl              | 6 | 35.4 | 8.6 | 3.5 |
| 2 %               | 6 | 28.5 | 9.5 | 3.9 |
| 5 %               | 6 | 26.4 | 7.1 | 2.9 |
| 10 %              | 6 | 20.9 | 5.2 | 2.1 |

Supplemental table 2

Actual fraction (%) of macrophages engulfing apoptotic neutrophils for Fig.1B

| Exposure time | n | mean | SD   | SEM |
|---------------|---|------|------|-----|
| Ctrl          | 6 | 35.4 | 8.6  | 3.5 |
| 2 h           | 6 | 22.6 | 11.6 | 4.7 |
| 8 h           | 6 | 24.1 | 8.9  | 3.6 |
| 24 h          | 6 | 20.9 | 5.2  | 2.1 |

Supplemental table 3

Actual fraction (%) of macrophages engulfing apoptotic neutrophils for Fig.1C

| Recovery time | n | Mean | SD   | SEM |
|---------------|---|------|------|-----|
| Ctrl          | 6 | 35.4 | 8.6  | 3.5 |
| 0 h           | 6 | 20.9 | 5.2  | 2.1 |
| 2 h           | 6 | 22.8 | 6.0  | 2.4 |
| 8 h           | 6 | 22.6 | 7.4  | 3.0 |
| 24 h          | 6 | 30.0 | 10.7 | 4.3 |
| group 1       | 3 | 24.9 | 8.9  | 5.1 |
| group 2       | 3 | 35.1 | 11.3 | 6.5 |

Supplemental table 4

Actual fraction (%) of macrophages engulfing apoptotic neutrophils for Fig.2B

| Recovery time | n | mean | SD  | SEM |
|---------------|---|------|-----|-----|
| Ctrl          | 9 | 27.3 | 7.0 | 2.3 |
| 0 h           | 4 | 17.4 | 3.5 | 1.7 |
| 2 h           | 4 | 16.2 | 4.3 | 2.1 |
| 6 h           | 4 | 22.6 | 6.4 | 3.2 |
| 10 h          | 4 | 20.4 | 5.6 | 2.8 |
| 24 h          | 5 | 25.1 | 4.2 | 1.9 |

Supplemental table 5

Actual fraction (%) of macrophages engulfing apoptotic neutrophils for Fig.2C

|        | n | mean | SD  | SEM |
|--------|---|------|-----|-----|
| Ctrl   | 4 | 43.7 | 4.4 | 2.2 |
| Smoker | 5 | 21.2 | 3.4 | 1.5 |

Supplemental table 6

Actual fraction (%) of macrophages engulfing apoptotic neutrophils for Fig.4B

| Smoking status                | n | mean | SD  | SEM |
|-------------------------------|---|------|-----|-----|
| <b>1 week</b>                 |   |      |     |     |
| ctrl                          | 5 | 30.0 | 4.2 | 1.9 |
| smoker                        | 4 | 27.7 | 6.9 | 3.4 |
| <b>4 weeks</b>                |   |      |     |     |
| ctrl                          | 6 | 21.0 | 3.8 | 1.6 |
| smoker                        | 5 | 16.8 | 3.6 | 1.6 |
| <b>12 weeks</b>               |   |      |     |     |
| ctrl                          | 5 | 22.3 | 0.9 | 0.4 |
| smoker                        | 5 | 16.9 | 1.1 | 0.5 |
| <b>12 weeks – 1 week quit</b> |   |      |     |     |
| ctrl                          | 7 | 28.7 | 5.4 | 2.1 |
| smoker                        | 6 | 25.1 | 5.4 | 2.2 |
| <b>12 weeks – 4 week quit</b> |   |      |     |     |
| ctrl                          | 6 | 25.7 | 5.5 | 2.3 |
| smoker                        | 6 | 24.9 | 3.1 | 1.3 |
